# Supplementary material for: Investigating the effect of UV light pre-treatment on the oxygen activation capacity of Au/TiO2
Source: Royal Society of Chemistry journal article supplement (doi:10.1039/c6cy01717g), 2016-01-01
Supplement: c6cy01717g1.pdf [file c6cy01717g1.pdf]

# Investigating the effect of UV light pre-treatment on the oxygen activation capacity of Au/TiO<sub>2</sub>

*Roong Jien Wong<sup>†</sup>, Jason Scott<sup>†\*</sup>, Gary K.-C. Low<sup>†</sup>, Haifeng Feng<sup>‡</sup>, Yi Du<sup>‡</sup>, Judy N. Hart<sup>§</sup>,  
Rose Amal<sup>†\*</sup>*

<sup>†</sup>Particles and Catalysis Research Group, School of Chemical Engineering, The University of New South Wales, Sydney, NSW 2052, Australia.

<sup>‡</sup>Institute for Superconducting and Electronic Materials (ISEM), University of Wollongong, Wollongong, New South Wales 2525, Australia.

<sup>§</sup>School of Materials Science and Engineering, UNSW Australia, Sydney, NSW, Australia.

\*E-mail: [jason.scott@unsw.edu.au](mailto:jason.scott@unsw.edu.au), [r.amal@unsw.edu.au](mailto:r.amal@unsw.edu.au)

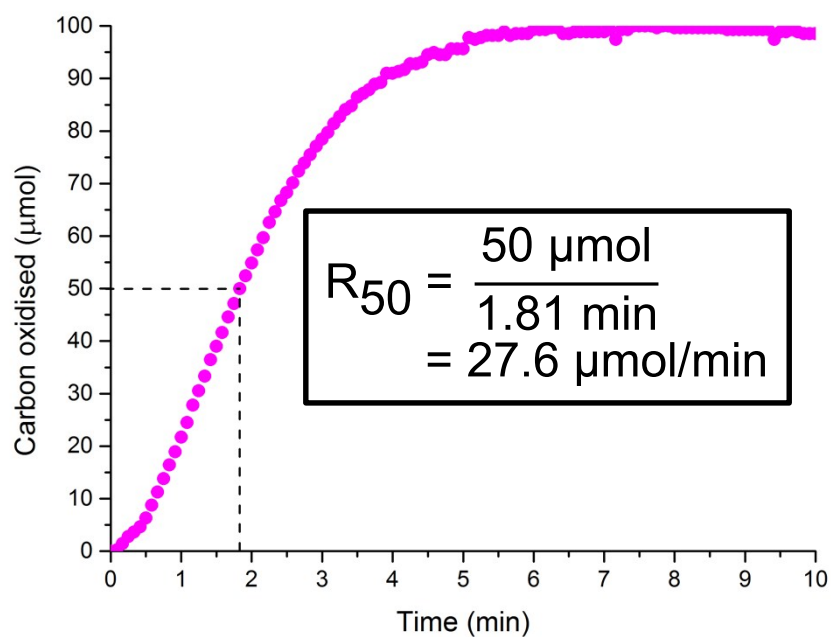

**Figure S1.** A typical reaction curve of 1 at% Au/TiO<sub>2</sub> showing the calculation of R<sub>50</sub> for the oxidation of 100 μmol formic acid after 30 min UV light pre-illumination. The 50 % formic acid oxidised point is determined to be at 50 μmol carbon oxidised.

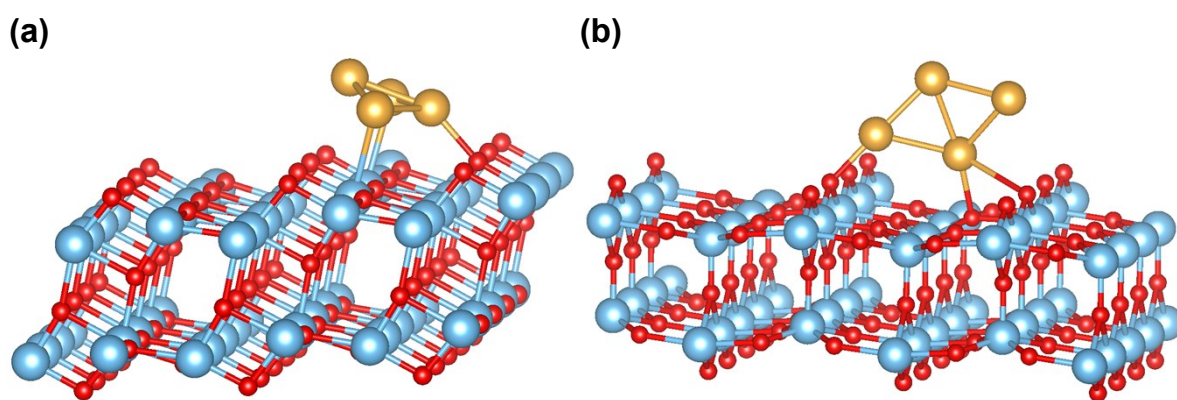

**Figure S2.** TiO<sub>2</sub> slab models used for DFT calculations for: (a) Au on anatase (101); (b) Au on rutile (110).

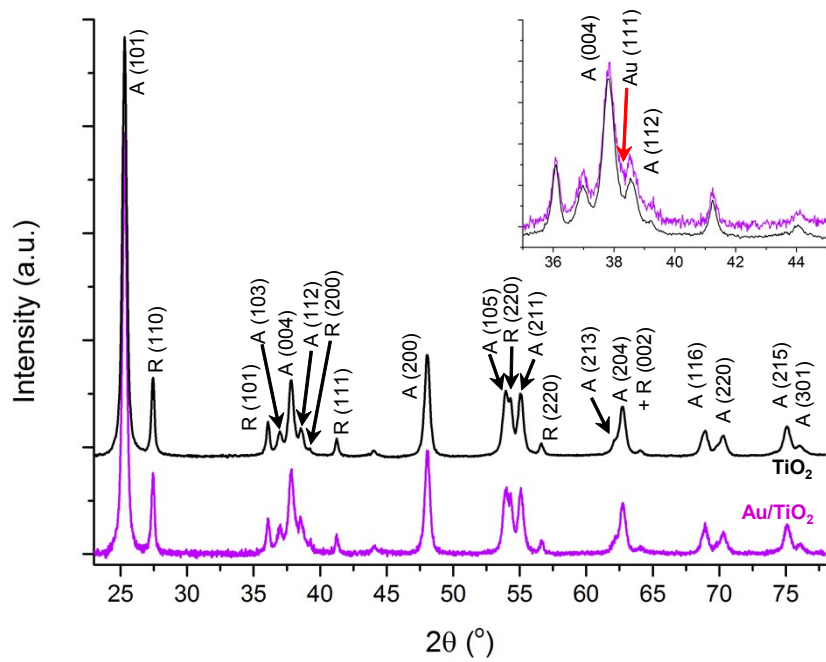

**Figure S3.** XRD profiles of neat  $\text{TiO}_2$  and as-prepared  $\text{Au/TiO}_2$  showing the presence of crystalline Au nanoparticles<sup>1,2</sup>. Au crystal size could not be determined due to interference from the anatase and rutile peaks.

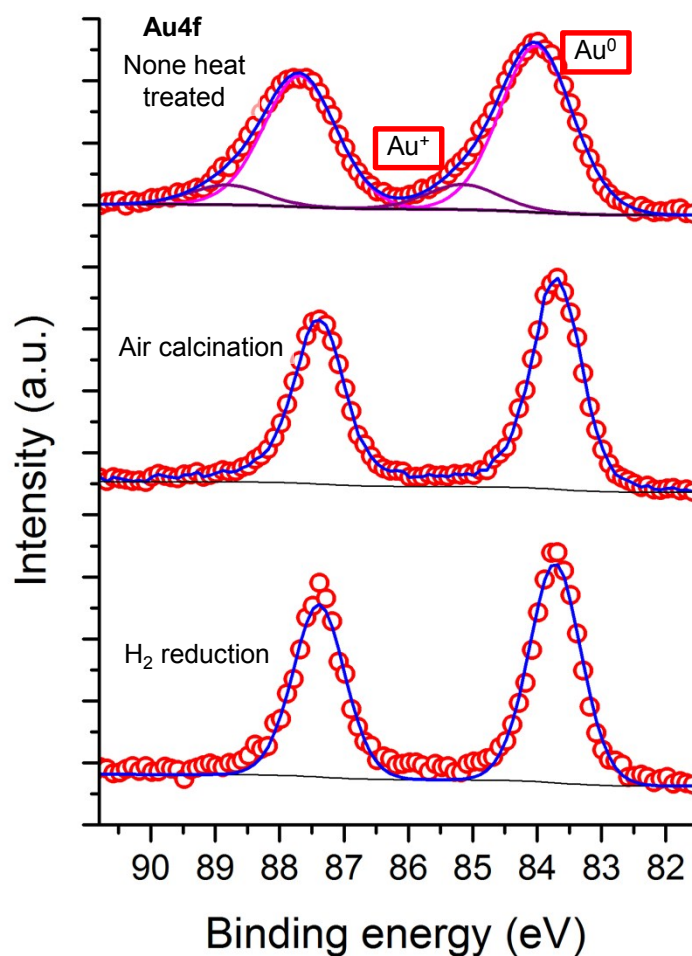

**Figure S4.** XPS Au4f core levels for 1.0 at% Au/TiO<sub>2</sub> before any heat treatment, after air calcination at 250 °C, and after H<sub>2</sub> reduction at 450 °C (as-prepared sample).

The XPS Au4f core level spectra show the change in Au oxidation states during the synthesis process. The Au oxidation state after the deposition-precipitation step has a higher oxidation state, as indicated by the presence of Au<sup>+</sup> species. The Au<sup>+</sup> species quickly disappear after air calcination, producing metallic Au<sup>0</sup> deposits on the TiO<sub>2</sub> support. The H<sub>2</sub> reduction step at high temperature is necessary to achieve highly metallic state and to improve the Au-TiO<sub>2</sub> interaction.

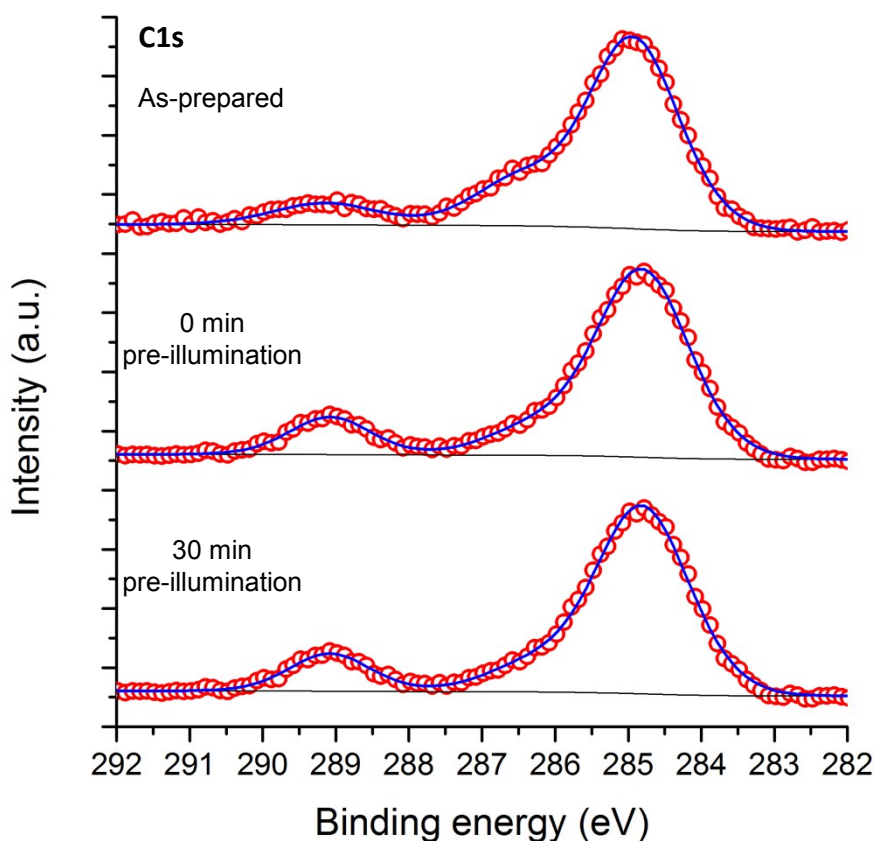

**Figure S5.** XPS C1s core levels for 1.0 at% Au/TiO<sub>2</sub> as-prepared, at 0 min light pre-illumination (i.e. immersed in water), and following 30 min light pre-illumination. Total carbon species on the Au/TiO<sub>2</sub> surface were 12.1 at%, 11.1 at%, and 11.2 at%, respectively, and are attributed to adventitious carbon.

Based on the XPS C1s core level spectra, UV light pre-illumination did not achieve significant photocleaning effect (i.e. no reduction in the amount of surface carbon species) on Au/TiO<sub>2</sub> prepared by deposition-precipitation, contrary to our observation on the Pt/TiO<sub>2</sub> prepared by photodeposition in the presence of organic hole scavenger<sup>3</sup>. It is therefore believed that the surface of Au/TiO<sub>2</sub> prepared by deposition-precipitation in the absence of organic additives is reasonably clean in its as-prepared state, and photocleaning of the surface during UV light pre-illumination has minimal contribution towards the enhancement of formic acid oxidation rate.

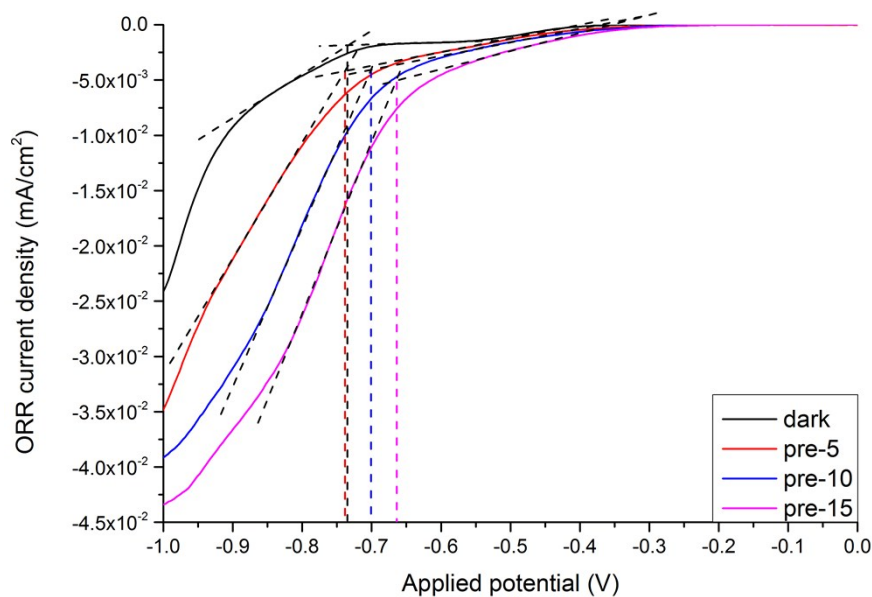

**Figure S6.** Current (I) – voltage (V) curve of Au/TiO<sub>2</sub> in the dark (black), after 5 min (red), 10 min (blue), and 15 min (pink) pre-illumination.

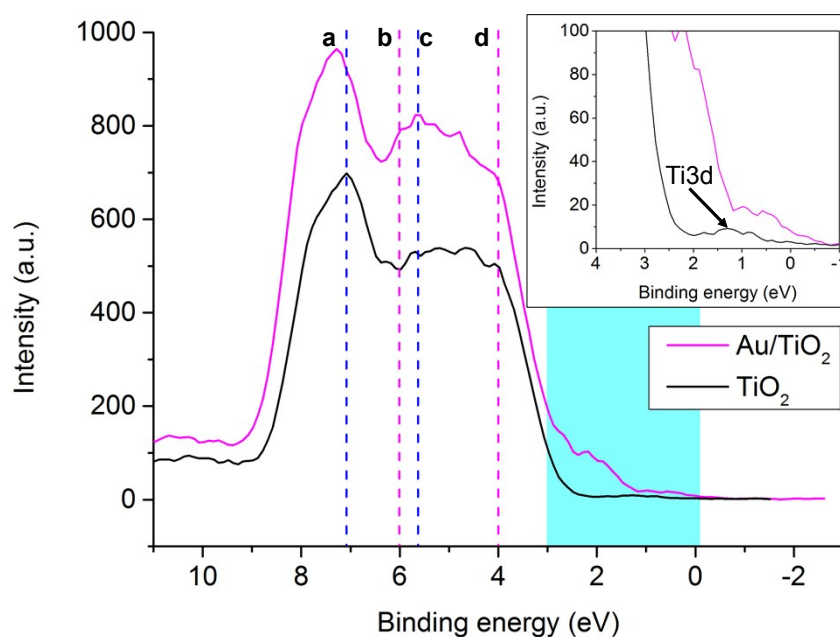

**Figure S7.** XPS valence band spectra of TiO<sub>2</sub> and Au/TiO<sub>2</sub>. New valence states from the presence of Au nanoparticles are highlighted in light blue. Inset: valence band of TiO<sub>2</sub> and Au/TiO<sub>2</sub> at low binding energies, showing signal of Ti3d in TiO<sub>2</sub> diminishing after Au deposition, suggesting electron transfer from Ti surface defect sites to Au and strong Au-Ti interaction. NB: O2p bonding state (a) and non-bonding state (c); Au5d<sub>3/2</sub> (b) and Au5d<sub>5/2</sub> (d).

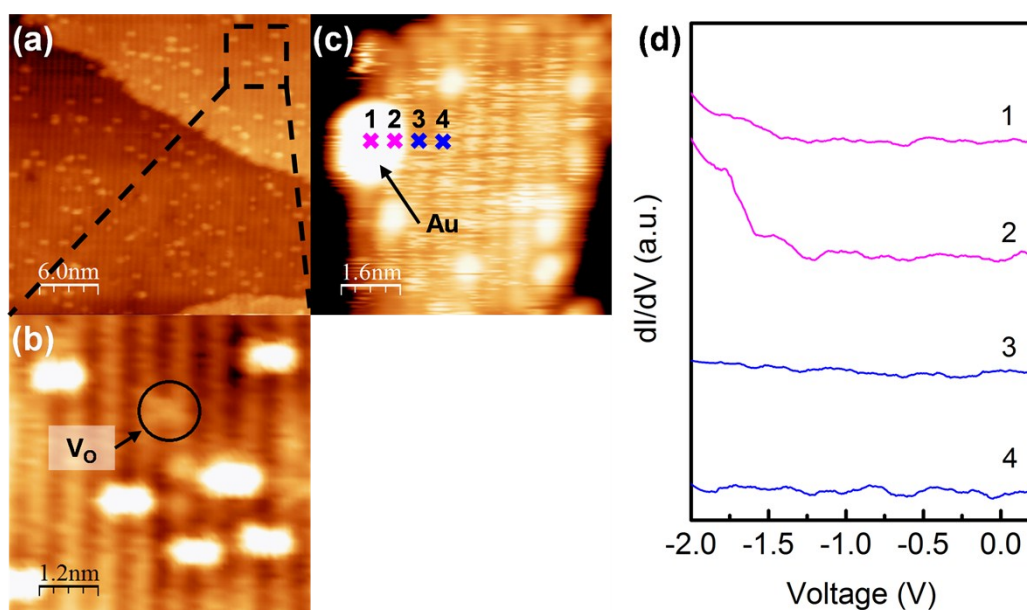

**Figure S8.** STM images showing: (a) the surface morphology of Au/TiO<sub>2</sub>; (b) a selected area revealing an oxygen vacancy (V<sub>O</sub>); (c) the presence of an Au nanocluster on TiO<sub>2</sub>; (d) STS across the Au/TiO<sub>2</sub> interface showing the new valence states intensity gradient on the Au nanoparticle ( $V_{\text{sample}} = 1.5 \text{ V}$ ,  $I = 100 \text{ pA}$ , lock-in modulation  $V = 20 \text{ mV}$  at  $937 \text{ Hz}$ ).

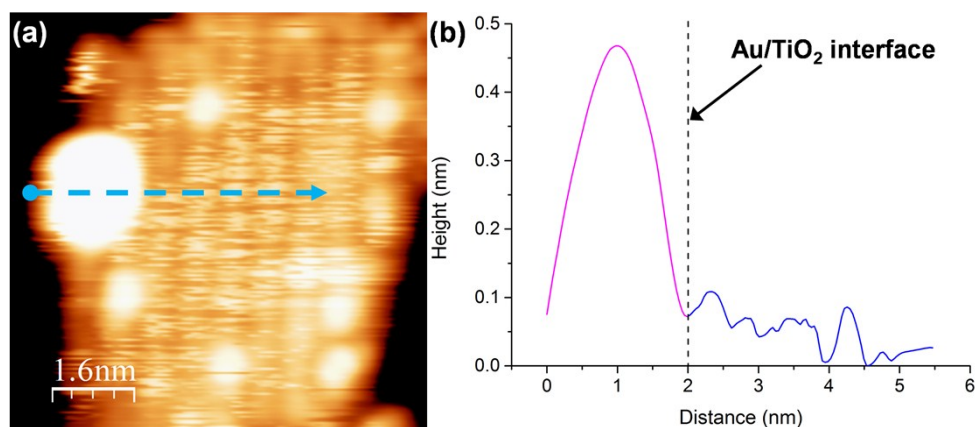

**Figure S9.** (a) STM image of Au nanocluster on TiO<sub>2</sub>; (b) Line profile of Au/TiO<sub>2</sub> as indicated by the blue dotted line in (a). The purple line segment and the blue line segment represent the Au nanocluster region and TiO<sub>2</sub> region, respectively, with the black dotted line highlighting the Au/TiO<sub>2</sub> interface.



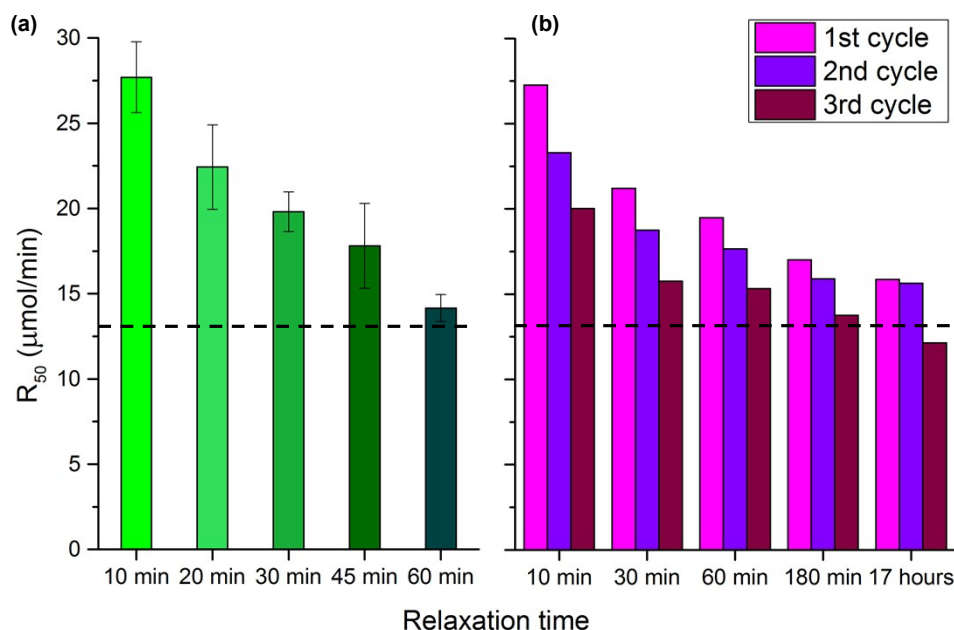

**Figure S10.** Stability of catalytic performance of Au/TiO<sub>2</sub>: (a) R<sub>50</sub> of 1 at% Au/TiO<sub>2</sub> after 30 min of UV pre-illumination. A total of 500 μmol of formic acid was injected into the system over five sequential 100 μmol injections. Each injection was performed immediately after all the formic acid in the system from the previous injection had been oxidized. No UV light pre-treatment was conducted between injections. (b) R<sub>50</sub> of 1 at% Au/TiO<sub>2</sub> at various relaxation times. A total of 500 μmol of formic acid was injected into the system in the form of five sequential 100 μmol injections at various time points over 17 hours with the five injections regarded as one cycle. After all the formic acid from the fifth injection had been oxidized, the Au/TiO<sub>2</sub> was re-illuminated for 30 min with UV light. The 17-hour experiment was repeated for three cycles. The horizontal black dotted lines in both graphs represent the R<sub>50</sub> of Au/TiO<sub>2</sub> without UV light pre-treatment.

## REFERENCES

- (1) Hussain, M.; Ahmad, M.; Nisar, A.; Sun, H.; Karim, S.; Khan, M.; Khan, S. D.; Iqbal, M.; Hussain, S. Z. *New J. Chem.* **2014**, *38*, 1424.
- (2) Khan, M. N. *J. Mod. Phys.* **2011**, *02*, 962–965.
- (3) Scott, J.; Irawaty, W.; Low, G.; Amal, R. *Appl. Catal. B Environ.* **2015**, *164*, 10–17.
